# Supplementary material for: Evolving Mortality Burden of Valvular Heart Disease with Atrial Fibrillation Among U.S. Adults Aged 45 Years and Older: Trends (1999–2023) and Projections to 2035
Source: Research Square preprint supplement (doi:10.21203/rs.3.rs-7950876/v1), 2025-11-27
Supplement: Supplementary file 1 [file bf5f62e159390ee11af6eb6c.docx]

**Supplementary Table 1. Number of VHD and AFIB Related Deaths, Stratified by Sex, Race and Age in Adults in the United States 1999-2023.**

| **Year** | **Overall** | **Women** | **Men** | **NH White** | **NH Black or African American** | | **NH Asian or Pacific Islander** | **Hispanic or Latino** | **Age group (45-64)** | **Age group (65+)** | **Population** |
| --- | --- | --- | --- | --- | --- | --- | --- | --- | --- | --- | --- |
| **1999** | 3462 | 2175 | 1287 | 3200 | 117 | 51 | | 77 | 148 | 3314 | 95153686 |
| **2000** | 3534 | 2259 | 1275 | 3311 | 102 | 33 | | 71 | 137 | 3397 | 96944389 |
| **2001** | 3580 | 2298 | 1282 | 3349 | 93 | 42 | | 85 | 139 | 3441 | 99781854 |
| **2002** | 3707 | 2328 | 1379 | 3465 | 113 | 46 | | 69 | 138 | 3569 | 102217733 |
| **2003** | 3927 | 2428 | 1499 | 3660 | 114 | 56 | | 83 | 131 | 3796 | 104692428 |
| **2004** | 3972 | 2430 | 1542 | 3693 | 128 | 62 | | 79 | 131 | 3841 | 107138553 |
| **2005** | 4327 | 2714 | 1613 | 4049 | 104 | 58 | | 99 | 172 | 4155 | 109787199 |
| **2006** | 4390 | 2697 | 1693 | 4111 | 121 | 57 | | 87 | 168 | 4222 | 112380379 |
| **2007** | 4762 | 2883 | 1879 | 4446 | 126 | 77 | | 100 | 178 | 4584 | 114894084 |
| **2008** | 4861 | 2948 | 1913 | 4540 | 140 | 54 | | 114 | 184 | 4677 | 117395131 |
| **2009** | 4982 | 2986 | 1996 | 4574 | 145 | 96 | | 155 | 188 | 4794 | 119895863 |
| **2010** | 5468 | 3191 | 2277 | 5051 | 161 | 97 | | 141 | 213 | 5255 | 121757429 |
| **2011** | 5924 | 3478 | 2446 | 5482 | 180 | 94 | | 144 | 203 | 5721 | 124174484 |
| **2012** | 6290 | 3631 | 2659 | 5780 | 182 | 94 | | 196 | 241 | 6049 | 126000296 |
| **2013** | 6930 | 3994 | 2936 | 6368 | 222 | 125 | | 179 | 248 | 6682 | 127788037 |
| **2014** | 7439 | 4191 | 3248 | 6740 | 244 | 131 | | 277 | 286 | 7153 | 129779643 |
| **2015** | 7824 | 4456 | 3368 | 7141 | 242 | 127 | | 271 | 283 | 7541 | 131826832 |
| **2016** | 8416 | 4710 | 3706 | 7672 | 248 | 171 | | 281 | 322 | 8094 | 133494018 |
| **2017** | 9255 | 5169 | 4086 | 8417 | 299 | 163 | | 337 | 373 | 8882 | 135229289 |
| **2018** | 9700 | 5345 | 4355 | 8732 | 347 | 207 | | 373 | 340 | 9360 | 136335528 |
| **2019** | 10264 | 5553 | 4711 | 9248 | 397 | 233 | | 343 | 398 | 9866 | 137381702 |
| **2020** | 11356 | 5934 | 5422 | 10154 | 470 | 237 | | 444 | 495 | 10861 | 138429175 |
| **2021** | 12304 | 6466 | 5838 | 10969 | 457 | 236 | | 517 | 523 | 11781 | 139339453 |
| **2022** | 12919 | 6873 | 6046 | 11526 | 529 | 263 | | 482 | 570 | 12349 | 140311934 |
| **2023** | 12918 | 6769 | 6149 | 11437 | 525 | 303 | | 526 | 513 | 12405 | 141596553 |
| **Total** | **172511** | **97906** | **74605** | **157115** | **5806** | **3113** | | **5530** | **6722** | **165789** | **3043725672** |

**Supplementary Table 2. Annual Percent Change (APC) and Average Annual Percent Change (AAPC) of VHD and AFIB –related Age-Adjusted Mortality Rates per 100,000 in Adults in the United States 1999-2023**

| **Year Interval** | **APC (95% CI)** | **Year Interval** | **AAPC (95% CI)** |
| --- | --- | --- | --- |
| **Overall** |  |  |  |
| 1999-2009 | 2.1183* (0.8996 to 2.9303) | 1999-2023 | 4.0124* (3.721 to 4.2745) |
| 2009-2023 | 5.3868* (5.0394 to 5.8791) |  |  |
| **Men** |  |  |  |
| 1999-2008 | 2.7853* (0.5636 to 3.5933) | 1999-2023 | 4.4459* (4.1954 to 4.6947) |
| 2008-2018 | 5.2529* (4.4142 to 5.9743) |  |  |
| 2018-2021 | 9.7302* (7.8053 to 11.0093) |  |  |
| 2021-2023 | 0.3107 (-2.0645 to 3.109) |  |  |
| **Women** |  |  |  |
| 1999-2010 | 1.9041* (0.5758 to 2.6823) | 1999-2023 | 3.5202* (3.2313 to 3.8077) |
| 2010-2023 | 4.9076* (4.4845 to 5.5364) |  |  |
| **NH White** |  |  |  |
| 1999-2009 | 2.3046* (0.9065 to 3.2014) | 1999-2020 | 4.3442* (4.0193 to 4.6424) |
| 2009-2023 | 5.8259* (5.4255 to 6.3891) |  |  |
| **NH Asian or Pacific Islander** |  |  |  |
| 1999-2015 | 1.7822 (-8.701 to 24.8338) | 1999-2023 | 2.8507* (1.8717 to 4.9317) |
| 2015-2023 | 5.0215* (2.3643 to 13.2586) |  |  |
| **NH Black or African American** |  |  |  |
| 1999-2009 | 0.8209 (-4.108 to 3.119) | 1999-2023 | 4.4932* (3.9055 to 5.2691) |
| 2009-2023 | 7.1979* (6.3181 to 8.7116) |  |  |
| **Hispanic or Latino** |  |  |  |
| 1999-2004 | -3.8043 (-22.2935 to 4.358) | 1999-2023 | 3.3320* (2.1585 to 4.9189) |
| 2004-2023 | 5.2964* (4.5333 to 8.6328) |  |  |
| **Census Region 1 – Northeast** |  |  |  |
| 1999-2008 | 0.7253 (-1.5375 to 2.054) | 1999-2023 | 3.4591* (3.0929 to 3.8395) |
| 2008-2023 | 5.1348* (4.6509 to 5.819) |  |  |
| **Census Region 2 – Midwest** |  |  |  |
| 1999-2010 | 2.4188* (0.5544 to 3.8197) | 1999-2023 | 4.0557* (3.6964 to 4.527) |
| 2010-2021 | 6.4339* (3.9866 to 10.3157) |  |  |
| 2021-2023 | 0.2681 (-3.9228 to 5.5989) |  |  |
| **Census Region 3 – South** |  |  |  |
| 1999-2012 | 2.7010* (1.1832 to 3.5788) | 1999-2023 | 4.3650* (4.0025 to 4.7561) |
| 2012-2023 | 6.3664* (5.6329 to 7.5876) |  |  |
| **Census Region 4 – West** |  |  |  |
| 1999-2009 | 2.7292 (-1.8582 to 3.8604) | 1999-2023 | 3.9362* (3.4939 to 4.3702) |
| 2009-2023 | 4.8070* (4.385 to 6.2298) |  |  |
| **Age group (45-64)** |  |  |  |
| 1999-2011 | 1.082 (-3.6257 to 3.3539) | 1999-2023 | 4.4538* (3.6677 to 5.3719) |
| 2011-2023 | 7.9380* (6.5286 to 10.4223) |  |  |
| **Age group (65+)** |  |  |  |
| 1999-2009 | 2.1971* (0.8823 to 3.0482) | 1999-2023 | 3.9975* (3.6917 to 4.2621) |
| 2009-2023 | 5.3029* (4.9571 to 5.7998) |  |  |
| **Metropolitan** |  |  |  |
| 1999-2009 | 2.0774* (1.4386 to 2.6314) | 1999-2020 | 3.5656* (3.4148 to 3.7713) |
| 2009-2020 | 4.9373* (4.6299 to 5.3614) |  |  |
| **Non-Metropolitan** |  |  |  |
| 1999-2011 | 3.1442* (1.7989 to 3.9138) | 1999-2020 | 4.4916* (4.1526 to 4.8882) |
| 2011-2020 | 6.3156* (5.5178 to 7.9356) |  |  |

*=indicates statistically significant value (p < 0.05)

**Supplementary Table 3. Overall and Sex‐Stratified VHD and AFIB –related Age-Adjusted Mortality Rates per 100,000 in Adults in the United States 1999-2023**

| Age-Adjusted Rate (95% CI) | | | |
| --- | --- | --- | --- |
| Year | **Overall** | **Men** | **Women** |
| **1999** | 3.64 (3.52 to 3.76) | 3.83 (3.62 to 4.05) | 3.58 (3.43 to 3.73) |
| **2000** | 3.69 (3.57 to 3.81) | 3.76 (3.55 to 3.97) | 3.65 (3.5 to 3.8) |
| **2001** | 3.68 (3.56 to 3.8) | 3.7 (3.49 to 3.9) | 3.66 (3.51 to 3.81) |
| **2002** | 3.77 (3.65 to 3.89) | 3.95 (3.74 to 4.16) | 3.67 (3.52 to 3.82) |
| **2003** | 3.91 (3.79 to 4.04) | 4.16 (3.95 to 4.37) | 3.75 (3.6 to 3.9) |
| **2004** | 3.9 (3.78 to 4.02) | 4.19 (3.98 to 4.4) | 3.75 (3.6 to 3.9) |
| **2005** | 4.14 (4.02 to 4.26) | 4.31 (4.1 to 4.53) | 4.06 (3.91 to 4.21) |
| **2006** | 4.13 (4.01 to 4.25) | 4.37 (4.16 to 4.58) | 3.98 (3.83 to 4.13) |
| **2007** | 4.37 (4.25 to 4.5) | 4.7 (4.48 to 4.91) | 4.18 (4.03 to 4.34) |
| **2008** | 4.36 (4.24 to 4.48) | 4.66 (4.45 to 4.87) | 4.2 (4.04 to 4.35) |
| **2009** | 4.38 (4.26 to 4.5) | 4.73 (4.53 to 4.94) | 4.17 (4.02 to 4.32) |
| **2010** | 4.74 (4.61 to 4.86) | 5.31 (5.09 to 5.53) | 4.39 (4.23 to 4.54) |
| **2011** | 4.95 (4.82 to 5.07) | 5.46 (5.24 to 5.68) | 4.63 (4.47 to 4.79) |
| **2012** | 5.11 (4.98 to 5.23) | 5.77 (5.55 to 5.99) | 4.72 (4.57 to 4.88) |
| **2013** | 5.53 (5.4 to 5.66) | 6.17 (5.95 to 6.39) | 5.11 (4.95 to 5.27) |
| **2014** | 5.8 (5.67 to 5.93) | 6.6 (6.37 to 6.82) | 5.29 (5.12 to 5.45) |
| **2015** | 5.96 (5.82 to 6.09) | 6.65 (6.43 to 6.88) | 5.51 (5.34 to 5.67) |
| **2016** | 6.29 (6.16 to 6.43) | 7.11 (6.88 to 7.34) | 5.69 (5.52 to 5.85) |
| **2017** | 6.76 (6.62 to 6.9) | 7.63 (7.39 to 7.86) | 6.16 (5.99 to 6.33) |
| **2018** | 6.93 (6.79 to 7.07) | 7.87 (7.64 to 8.11) | 6.25 (6.08 to 6.42) |
| **2019** | 7.16 (7.02 to 7.3) | 8.25 (8.02 to 8.49) | 6.41 (6.24 to 6.58) |
| **2020** | 7.83 (7.68 to 7.97) | 9.33 (9.08 to 9.58) | 6.77 (6.6 to 6.95) |
| **2021** | 9.01 (8.85 to 9.17) | 10.58 (10.31 to 10.86) | 7.95 (7.75 to 8.14) |
| **2022** | 8.86 (8.71 to 9.02) | 10.39 (10.12 to 10.65) | 7.8 (7.61 to 7.98) |
| **2023** | 8.93 (8.78 to 9.09) | 10.44 (10.17 to 10.7) | 7.9 (7.72 to 8.09) |

**Supplementary Table 4. VHD and AFIBAge-Adjusted Mortality Rates per 100,000, Stratified by Race in Adults in the United States 1999-2023**

| **Year** | **NH White** | **NH Black or African American** | **Hispanic or Latino** | **NH Asian or Pacific Islander** |
| --- | --- | --- | --- | --- |
| **1999** | 3.94 (3.8 to 4.07) | 1.58 (1.29 to 1.87) | 1.96 (1.53 to 2.46) | 2.44 (1.8 to 3.25) |
| **2000** | 4.02 (3.88 to 4.16) | 1.33 (1.07 to 1.6) | 1.63 (1.26 to 2.07) | 1.54 (1.04 to 2.2) |
| **2001** | 4.04 (3.9 to 4.18) | 1.23 (0.99 to 1.51) | 1.86 (1.47 to 2.31) | 2.06 (1.46 to 2.81) |
| **2002** | 4.11 (3.98 to 4.25) | 1.46 (1.19 to 1.74) | 1.5 (1.16 to 1.91) | 2.02 (1.47 to 2.71) |
| **2003** | 4.26 (4.13 to 4.4) | 1.48 (1.2 to 1.75) | 1.77 (1.4 to 2.2) | 2.3 (1.72 to 3.01) |
| **2004** | 4.28 (4.14 to 4.42) | 1.57 (1.29 to 1.85) | 1.45 (1.14 to 1.82) | 2.4 (1.83 to 3.09) |
| **2005** | 4.58 (4.44 to 4.72) | 1.27 (1.02 to 1.52) | 1.76 (1.42 to 2.16) | 2.04 (1.54 to 2.66) |
| **2006** | 4.57 (4.43 to 4.71) | 1.47 (1.2 to 1.73) | 1.56 (1.24 to 1.93) | 1.89 (1.43 to 2.47) |
| **2007** | 4.85 (4.71 to 4.99) | 1.45 (1.19 to 1.71) | 1.66 (1.33 to 2) | 2.5 (1.97 to 3.14) |
| **2008** | 4.87 (4.72 to 5.01) | 1.53 (1.27 to 1.79) | 1.8 (1.46 to 2.14) | 1.77 (1.32 to 2.31) |
| **2009** | 4.79 (4.65 to 4.93) | 1.54 (1.29 to 1.8) | 2.35 (1.98 to 2.73) | 2.69 (2.17 to 3.3) |
| **2010** | 5.26 (5.11 to 5.41) | 1.75 (1.47 to 2.02) | 2.07 (1.72 to 2.41) | 2.64 (2.13 to 3.23) |
| **2011** | 5.55 (5.41 to 5.7) | 1.89 (1.61 to 2.17) | 1.92 (1.6 to 2.24) | 2.42 (1.95 to 2.97) |
| **2012** | 5.72 (5.57 to 5.86) | 1.8 (1.54 to 2.07) | 2.41 (2.07 to 2.76) | 2.19 (1.76 to 2.69) |
| **2013** | 6.23 (6.07 to 6.38) | 2.12 (1.84 to 2.41) | 2.06 (1.75 to 2.36) | 2.7 (2.22 to 3.18) |
| **2014** | 6.5 (6.35 to 6.66) | 2.19 (1.91 to 2.47) | 3.02 (2.66 to 3.38) | 2.66 (2.2 to 3.11) |
| **2015** | 6.75 (6.59 to 6.91) | 2.19 (1.91 to 2.47) | 2.82 (2.48 to 3.16) | 2.34 (1.93 to 2.76) |
| **2016** | 7.19 (7.03 to 7.35) | 2.11 (1.85 to 2.38) | 2.71 (2.39 to 3.03) | 2.99 (2.54 to 3.45) |
| **2017** | 7.79 (7.62 to 7.96) | 2.41 (2.13 to 2.69) | 3.12 (2.78 to 3.45) | 2.74 (2.32 to 3.17) |
| **2018** | 7.94 (7.77 to 8.11) | 2.79 (2.49 to 3.09) | 3.28 (2.95 to 3.62) | 3.26 (2.81 to 3.7) |
| **2019** | 8.28 (8.11 to 8.45) | 3.08 (2.77 to 3.39) | 2.89 (2.58 to 3.2) | 3.47 (3.02 to 3.92) |
| **2020** | 9.02 (8.85 to 9.2) | 3.5 (3.18 to 3.82) | 3.6 (3.26 to 3.94) | 3.3 (2.88 to 3.72) |
| **2021** | 10.56 (10.36 to 10.76) | 3.53 (3.19 to 3.86) | 4.19 (3.82 to 4.55) | 3.47 (3.02 to 3.91) |
| **2022** | 10.36 (10.17 to 10.55) | 3.89 (3.55 to 4.23) | 3.7 (3.36 to 4.03) | 3.54 (3.11 to 3.97) |
| **2023** | 10.46 (10.26 to 10.65) | 3.86 (3.52 to 4.2) | 3.99 (3.64 to 4.34) | 4.01 (3.56 to 4.46) |

**Supplementary Table 5. VHD and AFIB –related Age-Adjusted Mortality Rates per 100,000, Stratified by Age groups in the United States 1999-2023**

|  | Age-Adjusted Rate (95% CI) | |
| --- | --- | --- |
| Year | **Age group (45-64)** | **Age group (65+)** |
| **1999** | 0.22 (0.18 to 0.25) | 9.66 (9.33 to 9.99) |
| **2000** | 0.22 (0.18 to 0.25) | 9.78 (9.46 to 10.11) |
| **2001** | 0.22 (0.18 to 0.25) | 9.77 (9.44 to 10.09) |
| **2002** | 0.22 (0.18 to 0.25) | 10.01 (9.68 to 10.34) |
| **2003** | 0.18 (0.15 to 0.21) | 10.48 (10.14 to 10.81) |
| **2004** | 0.18 (0.15 to 0.21) | 10.44 (10.11 to 10.77) |
| **2005** | 0.22 (0.19 to 0.25) | 11.03 (10.7 to 11.37) |
| **2006** | 0.22 (0.18 to 0.25) | 11 (10.67 to 11.33) |
| **2007** | 0.22 (0.19 to 0.25) | 11.68 (11.34 to 12.02) |
| **2008** | 0.22 (0.19 to 0.25) | 11.64 (11.31 to 11.98) |
| **2009** | 0.22 (0.19 to 0.25) | 11.69 (11.36 to 12.02) |
| **2010** | 0.26 (0.22 to 0.29) | 12.61 (12.26 to 12.95) |
| **2011** | 0.22 (0.19 to 0.25) | 13.25 (12.91 to 13.6) |
| **2012** | 0.26 (0.22 to 0.29) | 13.63 (13.28 to 13.98) |
| **2013** | 0.26 (0.23 to 0.29) | 14.79 (14.43 to 15.14) |
| **2014** | 0.3 (0.26 to 0.33) | 15.47 (15.11 to 15.83) |
| **2015** | 0.3 (0.26 to 0.33) | 15.9 (15.54 to 16.26) |
| **2016** | 0.36 (0.32 to 0.4) | 16.73 (16.36 to 17.09) |
| **2017** | 0.4 (0.35 to 0.44) | 17.94 (17.56 to 18.32) |
| **2018** | 0.36 (0.32 to 0.4) | 18.48 (18.1 to 18.85) |
| **2019** | 0.38 (0.34 to 0.41) | 19.09 (18.71 to 19.47) |
| **2020** | 0.51 (0.47 to 0.56) | 20.68 (20.29 to 21.07) |
| **2021** | 0.54 (0.49 to 0.58) | 23.9 (23.46 to 24.33) |
| **2022** | 0.61 (0.56 to 0.67) | 23.36 (22.95 to 23.77) |
| **2023** | 0.51 (0.47 to 0.56) | 23.73 (23.31 to 24.14) |

**Supplementary Table 6. VHD and AFIB-related Age-Adjusted Mortality Rate per 100,000 Stratified by Census Region in Adults in the United States 1999-2023**

| Age-Adjusted Rate (95% CI) | | | | |
| --- | --- | --- | --- | --- |
| Year | **Northeast** | **Midwest** | **South** | **West** |
| **1999** | 4.24 (3.96 to 4.52) | 3.72 (3.47 to 3.97) | 2.63 (2.46 to 2.81) | 4.75 (4.43 to 5.06) |
| **2000** | 4.19 (3.91 to 4.47) | 3.87 (3.62 to 4.13) | 2.7 (2.52 to 2.87) | 4.66 (4.35 to 4.97) |
| **2001** | 4.1 (3.82 to 4.37) | 3.66 (3.42 to 3.91) | 2.86 (2.68 to 3.04) | 4.68 (4.38 to 4.99) |
| **2002** | 4.05 (3.78 to 4.32) | 4.07 (3.81 to 4.32) | 2.88 (2.7 to 3.07) | 4.59 (4.29 to 4.89) |
| **2003** | 4.3 (4.03 to 4.58) | 4.04 (3.79 to 4.29) | 2.96 (2.78 to 3.15) | 4.99 (4.68 to 5.3) |
| **2004** | 4.39 (4.11 to 4.67) | 3.91 (3.66 to 4.16) | 2.99 (2.81 to 3.17) | 4.97 (4.66 to 5.27) |
| **2005** | 4.16 (3.89 to 4.43) | 4.4 (4.14 to 4.66) | 3.23 (3.04 to 3.41) | 5.37 (5.06 to 5.69) |
| **2006** | 4.29 (4.02 to 4.56) | 4.27 (4.01 to 4.52) | 3.11 (2.93 to 3.3) | 5.49 (5.18 to 5.8) |
| **2007** | 4.53 (4.25 to 4.81) | 4.64 (4.37 to 4.9) | 3.21 (3.03 to 3.39) | 5.87 (5.55 to 6.19) |
| **2008** | 4.52 (4.24 to 4.79) | 4.77 (4.51 to 5.04) | 3.16 (2.98 to 3.34) | 5.75 (5.44 to 6.06) |
| **2009** | 4.59 (4.32 to 4.86) | 4.47 (4.22 to 4.73) | 3.35 (3.17 to 3.53) | 5.76 (5.45 to 6.06) |
| **2010** | 5 (4.72 to 5.29) | 4.68 (4.42 to 4.94) | 3.64 (3.45 to 3.83) | 6.28 (5.96 to 6.59) |
| **2011** | 5.04 (4.75 to 5.32) | 5.27 (4.99 to 5.54) | 3.7 (3.52 to 3.89) | 6.59 (6.27 to 6.91) |
| **2012** | 5.16 (4.88 to 5.45) | 5.41 (5.13 to 5.68) | 3.89 (3.7 to 4.07) | 6.75 (6.43 to 7.06) |
| **2013** | 5.93 (5.63 to 6.23) | 5.88 (5.59 to 6.16) | 4.06 (3.88 to 4.25) | 7.14 (6.82 to 7.46) |
| **2014** | 6.3 (5.99 to 6.62) | 6.08 (5.79 to 6.36) | 4.42 (4.22 to 4.61) | 7.28 (6.96 to 7.6) |
| **2015** | 6.27 (5.96 to 6.58) | 6.47 (6.18 to 6.76) | 4.41 (4.22 to 4.6) | 7.62 (7.3 to 7.95) |
| **2016** | 6.26 (5.95 to 6.57) | 7.13 (6.82 to 7.43) | 4.55 (4.36 to 4.74) | 8.27 (7.94 to 8.6) |
| **2017** | 6.92 (6.6 to 7.24) | 7.37 (7.06 to 7.68) | 5.02 (4.82 to 5.22) | 8.81 (8.47 to 9.14) |
| **2018** | 6.75 (6.44 to 7.06) | 7.71 (7.4 to 8.03) | 5.35 (5.15 to 5.55) | 8.92 (8.58 to 9.25) |
| **2019** | 7.01 (6.7 to 7.33) | 8.24 (7.92 to 8.56) | 5.53 (5.33 to 5.73) | 9.04 (8.71 to 9.37) |
| **2020** | 8.13 (7.8 to 8.47) | 8.9 (8.57 to 9.23) | 5.92 (5.72 to 6.13) | 9.62 (9.28 to 9.96) |
| **2021** | 9.17 (8.8 to 9.53) | 9.94 (9.58 to 10.3) | 7.07 (6.84 to 7.3) | 11.27 (10.89 to 11.65) |
| **2022** | 9.03 (8.67 to 9.38) | 9.34 (9 to 9.68) | 7.05 (6.83 to 7.27) | 11.15 (10.79 to 11.51) |
| **2023** | 9.28 (8.91 to 9.64) | 9.68 (9.33 to 10.03) | 7.18 (6.96 to 7.41) | 10.85 (10.49 to 11.21) |

**Supplementary Table 7. VHD and AFIB related Age-Adjusted Mortality Rates per 100,000 in the Metropolitan and Non-metropolitan areas in Adults in the United States 1999-2020**

|  | Age-Adjusted Rate (95% CI) | |
| --- | --- | --- |
| Year | **Metropolitan** | **Nonmetropolitan** |
| **1999** | 3.69 (3.55 to 3.82) | 3.47 (3.2 to 3.74) |
| **2000** | 3.72 (3.59 to 3.86) | 3.63 (3.36 to 3.91) |
| **2001** | 3.61 (3.47 to 3.74) | 3.95 (3.66 to 4.23) |
| **2002** | 3.83 (3.69 to 3.97) | 3.43 (3.17 to 3.7) |
| **2003** | 3.96 (3.82 to 4.09) | 3.84 (3.57 to 4.12) |
| **2004** | 3.84 (3.71 to 3.97) | 4.25 (3.96 to 4.55) |
| **2005** | 4.13 (3.99 to 4.27) | 4.2 (3.91 to 4.49) |
| **2006** | 4.15 (4.01 to 4.28) | 4.13 (3.84 to 4.42) |
| **2007** | 4.3 (4.16 to 4.43) | 4.71 (4.41 to 5.01) |
| **2008** | 4.3 (4.17 to 4.44) | 4.56 (4.27 to 4.86) |
| **2009** | 4.32 (4.19 to 4.46) | 4.63 (4.33 to 4.93) |
| **2010** | 4.67 (4.53 to 4.81) | 4.92 (4.62 to 5.23) |
| **2011** | 4.94 (4.8 to 5.08) | 4.98 (4.68 to 5.28) |
| **2012** | 5.07 (4.93 to 5.21) | 5.26 (4.95 to 5.57) |
| **2013** | 5.47 (5.33 to 5.62) | 5.72 (5.4 to 6.04) |
| **2014** | 5.68 (5.53 to 5.82) | 6.31 (5.98 to 6.64) |
| **2015** | 5.82 (5.68 to 5.97) | 6.57 (6.23 to 6.91) |
| **2016** | 6.2 (6.06 to 6.35) | 6.66 (6.32 to 7) |
| **2017** | 6.63 (6.48 to 6.78) | 7.26 (6.91 to 7.61) |
| **2018** | 6.8 (6.65 to 6.96) | 7.67 (7.31 to 8.03) |
| **2019** | 6.99 (6.84 to 7.14) | 8.01 (7.65 to 8.37) |
| **2020** | 7.59 (7.43 to 7.75) | 8.96 (8.58 to 9.34) |

**Supplementary Table 8. VHD and AFIB –related mortality, Stratified by States in Adults in the United States 1999-2023 ranked according to Percentiles.**

| **State** | **Percentile** | **Rank** | **Deaths** |
| --- | --- | --- | --- |
| Oregon | 98 | 1 | 1525 |
| Vermont | 96 | 2 | 231 |
| Minnesota | 94 | 3 | 1730 |
| Washington | 92 | 4 | 1964 |
| Nebraska | 90 | 5 | 417 |
| Wisconsin | 88 | 6 | 1231 |
| Wyoming | 86 | 7 | 112 |
| Idaho | 84 | 8 | 326 |
| Colorado | 82 | 9 | 910 |
| South Dakota | 80 | 10 | 181 |
| Iowa | 78 | 11 | 612 |
| Maine | 76 | 12 | 282 |
| Delaware | 75 | 13 | 176 |
| Pennsylvania | 73 | 14 | 2358 |
| Maryland | 71 | 15 | 929 |
| Montana | 69 | 16 | 179 |
| New Hampshire | 67 | 17 | 231 |
| Rhode Island | 65 | 18 | 180 |
| South Carolina | 63 | 19 | 677 |
| North Dakota | 61 | 20 | 95 |
| Virginia | 59 | 21 | 946 |
| Tennessee | 57 | 22 | 741 |
| Oklahoma | 55 | 23 | 408 |
| Massachusetts | 53 | 24 | 818 |
| Kansas | 51 | 25 | 324 |
| California | 50 | 26 | 3995 |
| New Jersey | 48 | 27 | 1051 |
| Alaska | 46 | 28 | 47 |
| Kentucky | 42 | 29.5 | 438 |
| Nevada | 42 | 29.5 | 286 |
| Ohio | 40 | 31 | 1233 |
| North Carolina | 38 | 32 | 1005 |
| Missouri | 36 | 33 | 643 |
| Indiana | 34 | 34 | 646 |
| West Virginia | 32 | 35 | 196 |
| Arizona | 30 | 36 | 749 |
| Texas | 28 | 37 | 2057 |
| New York | 26 | 38 | 2057 |
| Hawaii | 25 | 39 | 172 |
| Michigan | 23 | 40 | 882 |
| Florida | 21 | 41 | 2350 |
| Mississippi | 19 | 42 | 226 |
| Connecticut | 17 | 43 | 317 |
| Arkansas | 13 | 44.5 | 226 |
| Utah | 13 | 44.5 | 161 |
| District of Columbia | 11 | 46 | 39 |
| Illinois | 9 | 47 | 812 |
| Louisiana | 7 | 48 | 238 |
| Alabama | 5 | 49 | 273 |
| New Mexico | 3 | 50 | 99 |
| Georgia | 1 | 51 | 360 |

**Supplementary Table 9. VHD and AFIB -related Mortality, Stratified by Place of Death in Adults in the United States 1999-2023.**

| **c** | **Deaths** | | | | |
| --- | --- | --- | --- | --- | --- |
| **Year** | **Medical Facility** | **Nursing Home/Long-term Care Facility** | **Hospices** | **Home** | **Other/Unknown** |
| **1999** | 1763 | 846 | Missing | 760 | 93 |
| **2000** | 1750 | 897 | Missing | 775 | 107 |
| **2001** | 1761 | 914 | Missing | 793 | 112 |
| **2002** | 1797 | 896 | Missing | 882 | 132 |
| **2003** | 1870 | 955 | 13 | 923 | 157 |
| **2004** | 1884 | 909 | 14 | 982 | 183 |
| **2005** | 1957 | 1047 | 49 | 1092 | 198 |
| **2006** | 2009 | 1015 | 62 | 1111 | 186 |
| **2007** | 2147 | 1080 | 108 | 1227 | 219 |
| **2008** | 2147 | 1105 | 130 | 1257 | 241 |
| **2009** | 2159 | 1103 | 127 | 1303 | 237 |
| **2010** | 2304 | 1225 | 203 | 1505 | 229 |
| **2011** | 2463 | 1286 | 247 | 1630 | 295 |
| **2012** | 2467 | 1337 | 325 | 1856 | 303 |
| **2013** | 2706 | 1516 | 328 | 2025 | 352 |
| **2014** | 2903 | 1616 | 387 | 2179 | 350 |
| **2015** | 2979 | 1658 | 499 | 2363 | 324 |
| **2016** | 3122 | 1808 | 577 | 2562 | 347 |
| **2017** | 3453 | 1858 | 667 | 2852 | 422 |
| **2018** | 3560 | 2013 | 707 | 2990 | 429 |
| **2019** | 3736 | 2100 | 776 | 3201 | 449 |
| **2020** | 3920 | 1972 | 764 | 4149 | 551 |
| **2021** | 4582 | 1925 | 903 | 4316 | 573 |
| **2022** | 4873 | 2063 | 949 | 4378 | 655 |
| **2023** | 4818 | 2258 | 1042 | 4204 | 595 |
| **Total** | **69130** | **35402** | **8877** | **51315** | **7739** |

**Supplementary Table 10. VHD and AFIB –related forecasted age adjusted mortality trends in adults in the United States from 2024-2035.**

| Year | **Overall** | **Male** | **Female** |
| --- | --- | --- | --- |
| 2024 | 8.93 (3.69 to 14.17) | 10.79 (3.27 to 18.31) | 7.44 (6.05 to 8.82) |
| 2025 | 9.26 (3.06 to 15.46) | 11.25 (2.36 to 20.14) | 7.65 (6.05 to 9.25) |
| 2026 | 9.59 (2.39 to 16.79) | 11.71 (1.37 to 22.05) | 7.87 (6.03 to 9.7) |
| 2027 | 9.92 (1.66 to 18.18) | 12.17 (0.32 to 24.02) | 8.08 (6 to 10.16) |
| 2028 | 10.25 (0.89 to 19.61) | 12.63 (-0.8 to 26.06) | 8.3 (5.97 to 10.63) |
| 2029 | 10.58 (0.08 to 21.08) | 13.09 (-1.99 to 28.17) | 8.51 (5.92 to 11.11) |
| 2030 | 10.91 (-0.78 to 22.6) | 13.55 (-3.23 to 30.33) | 8.73 (5.86 to 11.6) |
| 2031 | 11.24 (-1.69 to 24.17) | 14.01 (-4.54 to 32.56) | 8.95 (5.8 to 12.1) |
| 2032 | 11.57 (-2.63 to 25.77) | 14.47 (-5.91 to 34.85) | 9.16 (5.72 to 12.6) |
| 2033 | 11.9 (-3.61 to 27.41) | 14.93 (-7.33 to 37.19) | 9.38 (5.64 to 13.12) |
| 2034 | 12.23 (-4.63 to 29.09) | 15.39 (-8.8 to 39.58) | 9.59 (5.55 to 13.64) |
| 2035 | 12.56 (-5.68 to 30.8) | 15.85 (-10.33 to 42.03) | 9.81 (5.45 to 14.17) |
